# Supplementary material for: Bromotrimethylsilane as a selective reagent for the synthesis of bromohydrins
Source: Royal Society of Chemistry journal article supplement (doi:10.1039/d1ra01980e), 2021-01-01

## Bromotrimethylsilane as a Selective Reagent for the Synthesis of Bromohydrins

Donatella Giomi,\* Antonella Salvini,\* Jacopo Ceccarelli, and Alberto Brandi

### Summary

|                                                                                                                                                        |    |
|--------------------------------------------------------------------------------------------------------------------------------------------------------|----|
| <sup>1</sup> H and <sup>13</sup> C NMR data of compounds <b>6</b> , <b>4</b> , and <b>8</b> .....                                                      | 2  |
| <sup>13</sup> C NMR spectra (DMSO- <i>d</i> <sub>6</sub> ) of reaction crudes obtained by heating glycerol ( <b>3</b> ) and TMSBr at 60 °C .....       | 3  |
| <sup>13</sup> C NMR spectra (DMSO- <i>d</i> <sub>6</sub> ) of reaction crudes obtained by treatment of glycerol ( <b>3</b> ) with TMSBr at 20 °C ..... | 5  |
| <sup>1</sup> H NMR spectrum (CDCl <sub>3</sub> ) of Sunflower Oil ( <b>1</b> ) .....                                                                   | 7  |
| <sup>1</sup> H NMR spectrum (CDCl <sub>3</sub> ) of the reaction mixture of Sunflower oil ( <b>1</b> ) heated at 60 °C for 8 hours .....               | 7  |
| <sup>1</sup> H NMR spectrum (CDCl <sub>3</sub> ) of the reaction mixture of Sunflower oil ( <b>1</b> ) heated at 100 °C for 72 hours .....             | 8  |
| <sup>1</sup> H NMR spectrum (CDCl <sub>3</sub> ) of Castor Oil ( <b>2</b> ) .....                                                                      | 8  |
| <sup>1</sup> H NMR spectrum (CDCl <sub>3</sub> ) of the reaction mixture of Castor Oil ( <b>2</b> ) heated at 60 °C for 12+6 hours .....               | 9  |
| <sup>13</sup> C NMR spectrum (DMSO- <i>d</i> <sub>6</sub> ) of the reaction mixture of Castor Oil ( <b>2</b> ) heated at 60 °C for 12+6 hours .....    | 9  |
| <sup>1</sup> H NMR spectrum (CDCl <sub>3</sub> ) of methyl ricinoleate ( <b>6</b> ) .....                                                              | 10 |
| <sup>1</sup> H NMR spectrum (CDCl <sub>3</sub> ) of 1-MBH ( <b>4</b> ) .....                                                                           | 10 |
| <sup>13</sup> C NMR spectrum (CDCl <sub>3</sub> ) of 1-MBH ( <b>4</b> ) .....                                                                          | 11 |
| <sup>1</sup> H NMR spectrum (CDCl <sub>3</sub> ) of 1,3-DBH ( <b>8</b> ) .....                                                                         | 11 |
| <sup>13</sup> C NMR spectrum (CDCl <sub>3</sub> ) of 1,3-DBH ( <b>8</b> ) .....                                                                        | 12 |

<sup>1</sup>H and <sup>13</sup>C NMR data of compounds **6**, **4**, and **8**

Methyl ricinoleate (**6**): <sup>1</sup>H-NMR (400 MHz, CDCl<sub>3</sub>) δ (ppm) 5.54 (m, 1H; H-9), 5.39 (m, 1H; H-10), 3.65 (s, 3H; OCH<sub>3</sub>), 3.60 (m, 1H; H-12), 2.29 (t, 7.5 Hz, 2H; H-2), 2.20 (m, 2H; H-11), 2.03 (m, 2H; H-8), 1.60 (m, 2H; H-3), 1.45 (m, 2H; H-13), 1.39-1.21 (m, 16H; CH<sub>2</sub> chain), 0.87 (m, 3H; H-18).

1-MBH (**4**): <sup>1</sup>H-NMR (CDCl<sub>3</sub>) δ (ppm): 4.03-3.86 (m, 1H), 3.84-3.64 (m, 2H), 3.57-3.43 (m, 2H), 2.09 (br s, 2H); <sup>13</sup>C NMR (CDCl<sub>3</sub>) δ (ppm): 71.3 (d), 64.2 (t), 35.2 (t).

1,3-DBH (**8**): <sup>1</sup>H NMR (CDCl<sub>3</sub>) δ (ppm): 4.02 (quintet, J = 5.3 Hz, 1H), 3.63-3.56 (m, 4H), 2.22 (s, 1H); <sup>13</sup>C-NMR (CDCl<sub>3</sub>) δ (ppm): 69.5 (d), 35.0 (t).

$^{13}\text{C}$  NMR spectra ( $\text{DMSO-}d_6$ ) of reaction crudes obtained by heating glycerol (**3**) and TMSBr at  $60\text{ }^\circ\text{C}$ : (a) for 12 hours, without AcOH; (b) for 6 hours with 3% of AcOH; (c) for 9 hours with 3% of AcOH.

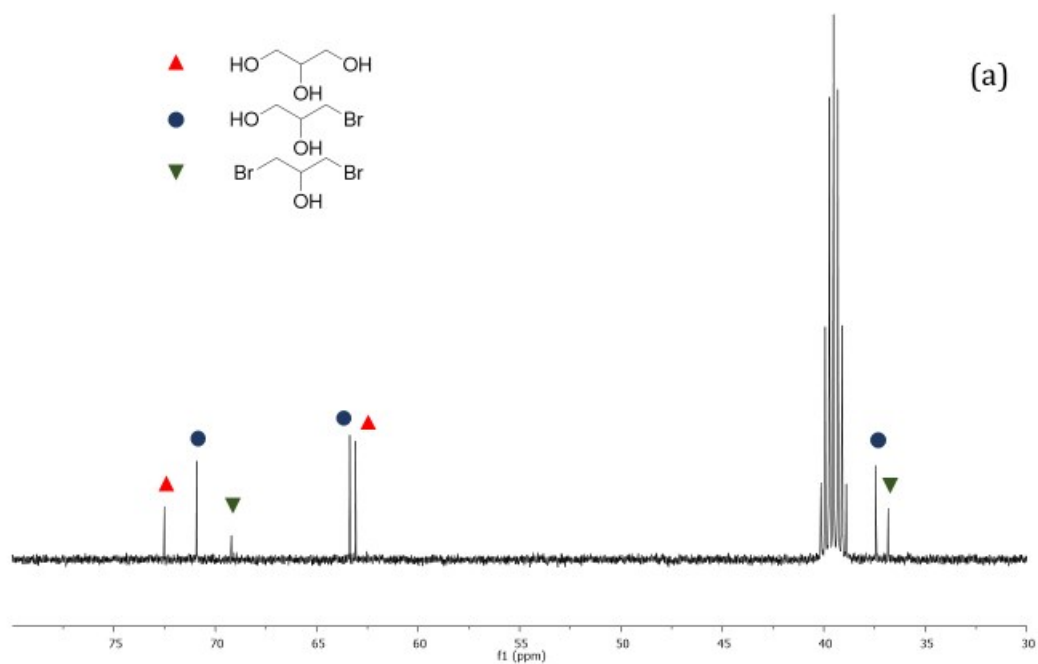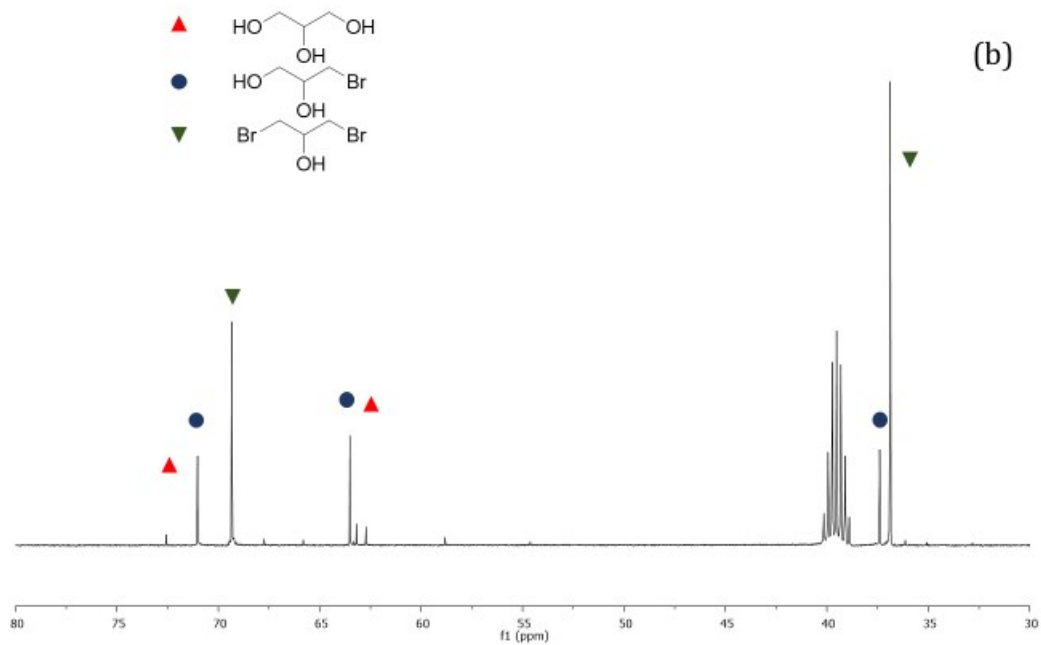

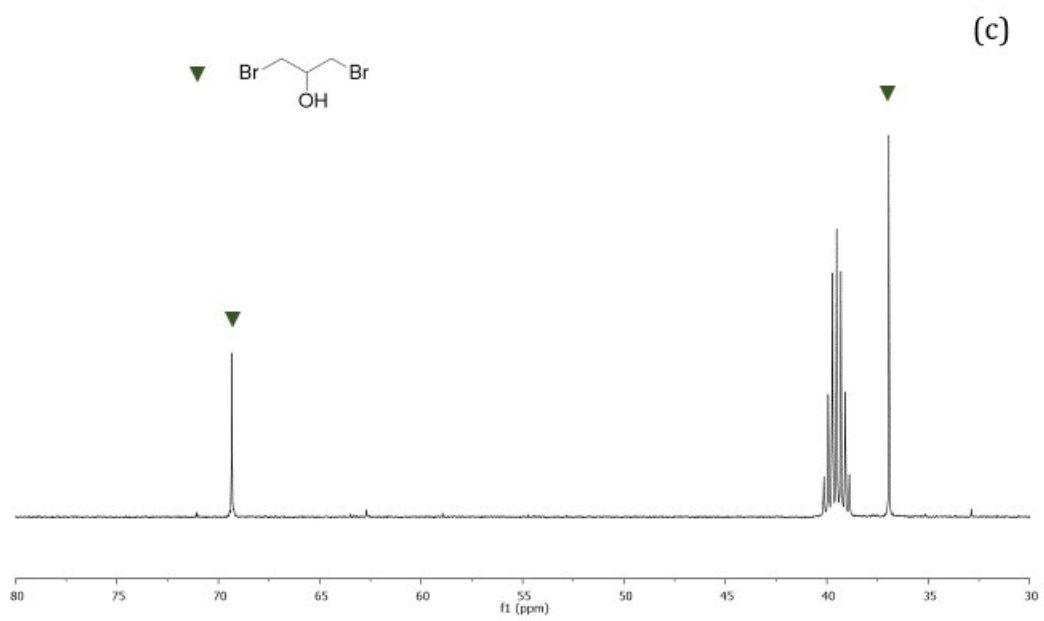

$^{13}\text{C}$  NMR spectra ( $\text{DMSO-}d_6$ ) of reaction crudes obtained by treatment of glycerol (**3**) with  $\text{TMSBr}$  at  $20\text{ }^\circ\text{C}$ : (a) for 24 hours, without  $\text{AcOH}$ ; (b) for 24 hours with 3% of  $\text{AcOH}$ ; (c) for 48 hours with 3% of  $\text{AcOH}$ .

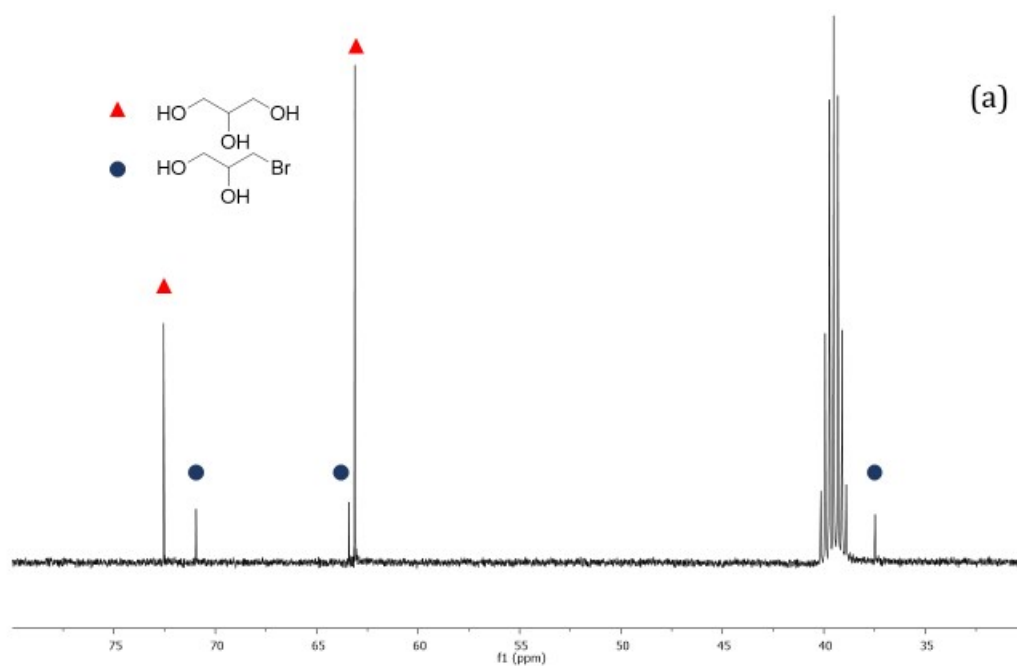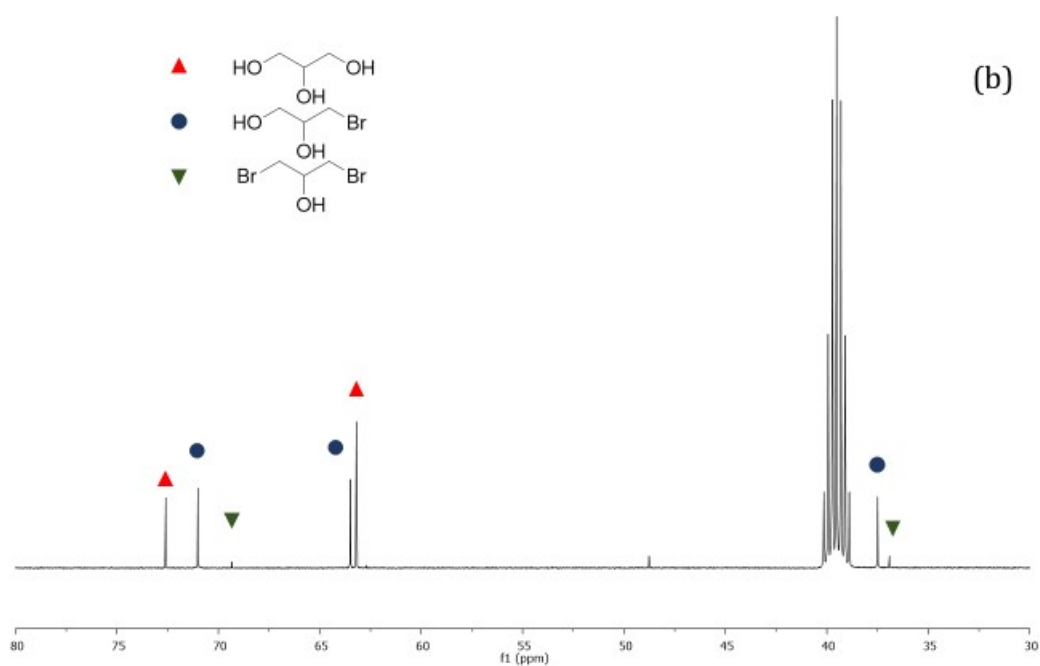

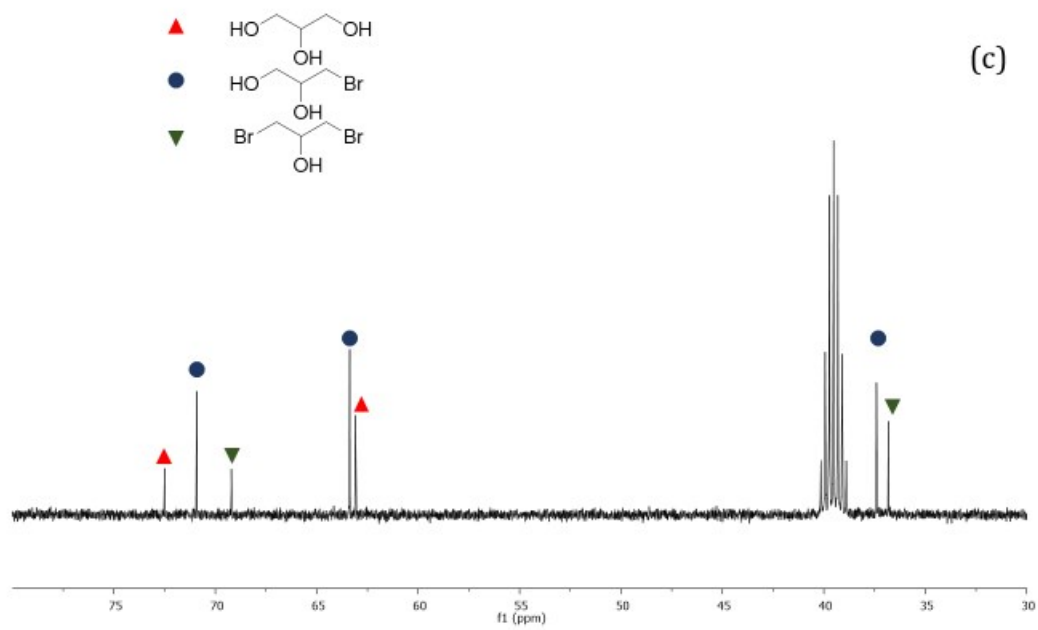

$^1\text{H}$  NMR spectrum ( $\text{CDCl}_3$ ) of Sunflower Oil (**1**)

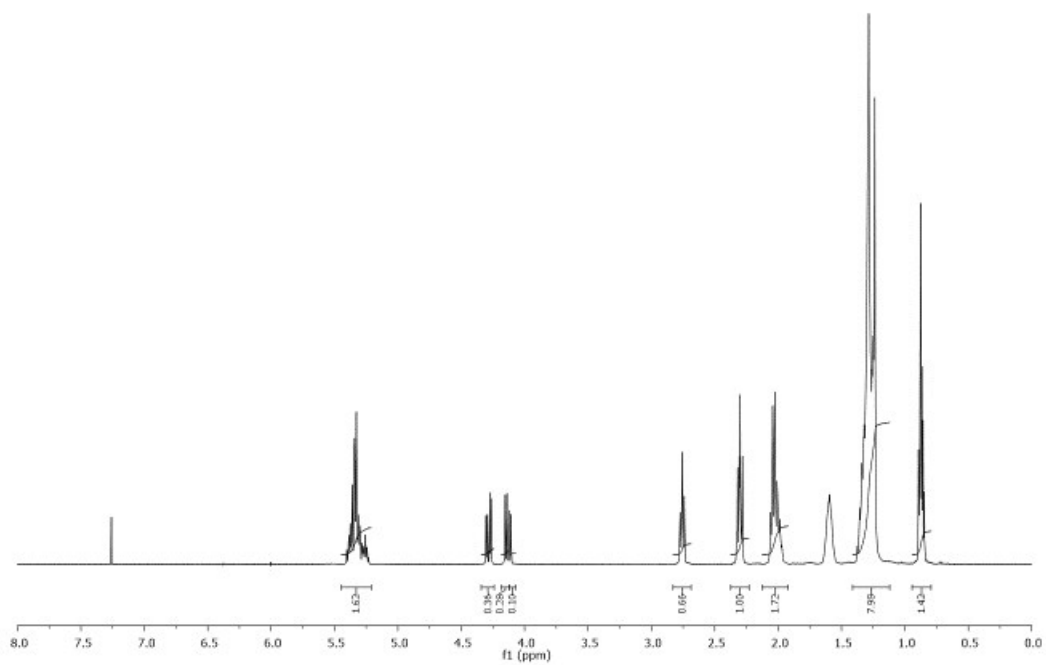

$^1\text{H}$  NMR spectrum ( $\text{CDCl}_3$ ) of the reaction mixture of Sunflower oil (**1**) heated at  $60\text{ }^\circ\text{C}$  for 8 hours

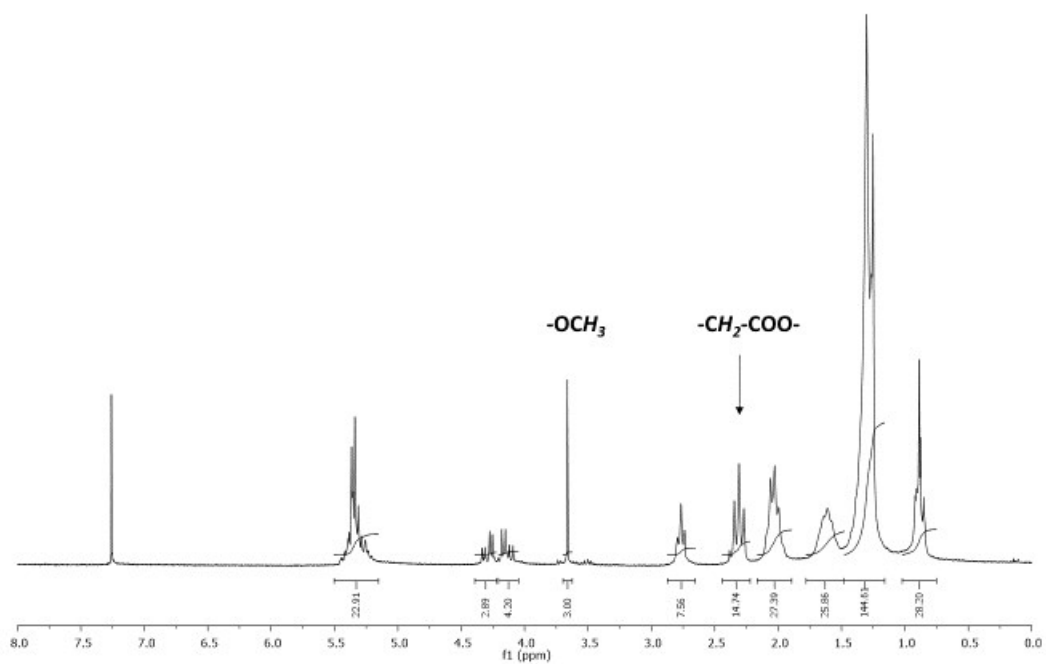

$^1\text{H}$  NMR spectrum ( $\text{CDCl}_3$ ) of the reaction mixture of Sunflower oil (**1**) heated at  $100\text{ }^\circ\text{C}$  for 72 hours

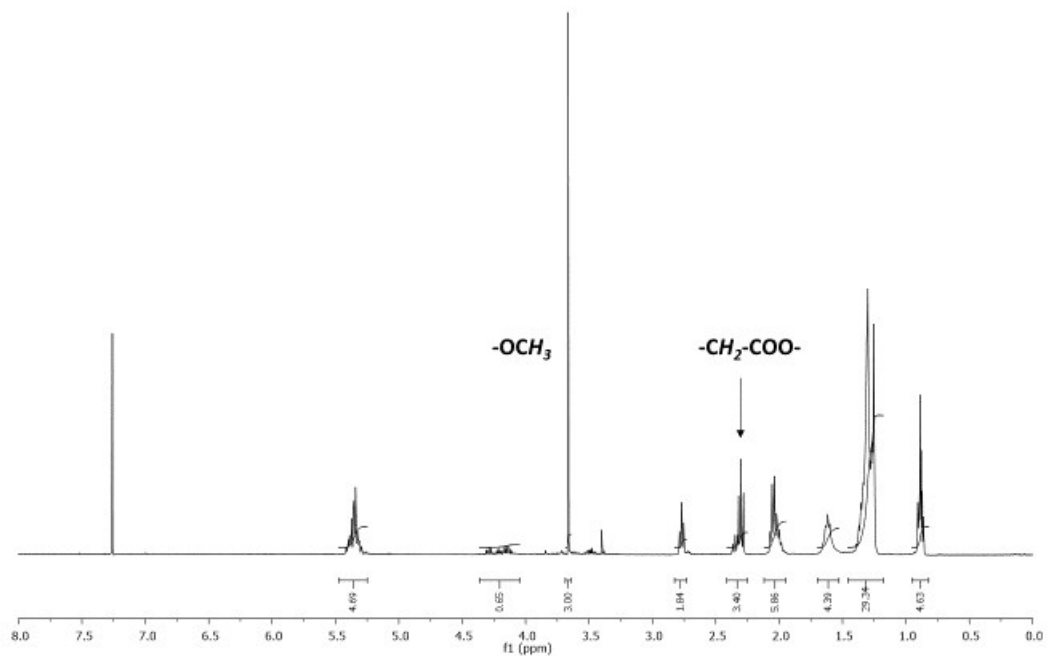

$^1\text{H}$  NMR spectrum ( $\text{CDCl}_3$ ) of Castor Oil (**2**)

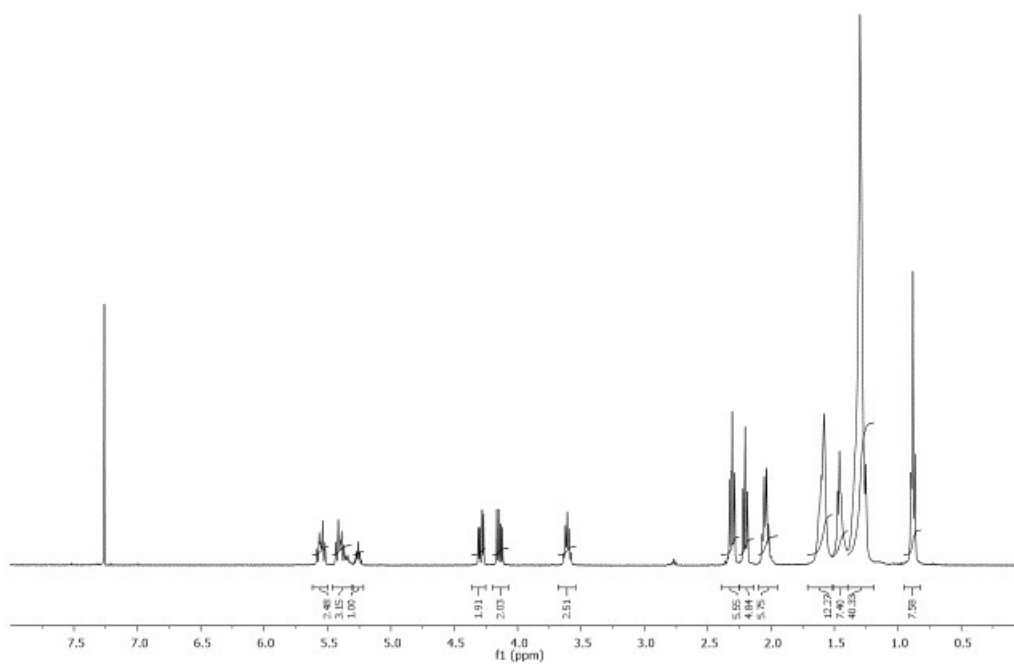



$^1\text{H}$  NMR spectrum ( $\text{CDCl}_3$ ) of the reaction mixture of Castor Oil (**2**) heated at  $60\text{ }^\circ\text{C}$  for 12+6 hours

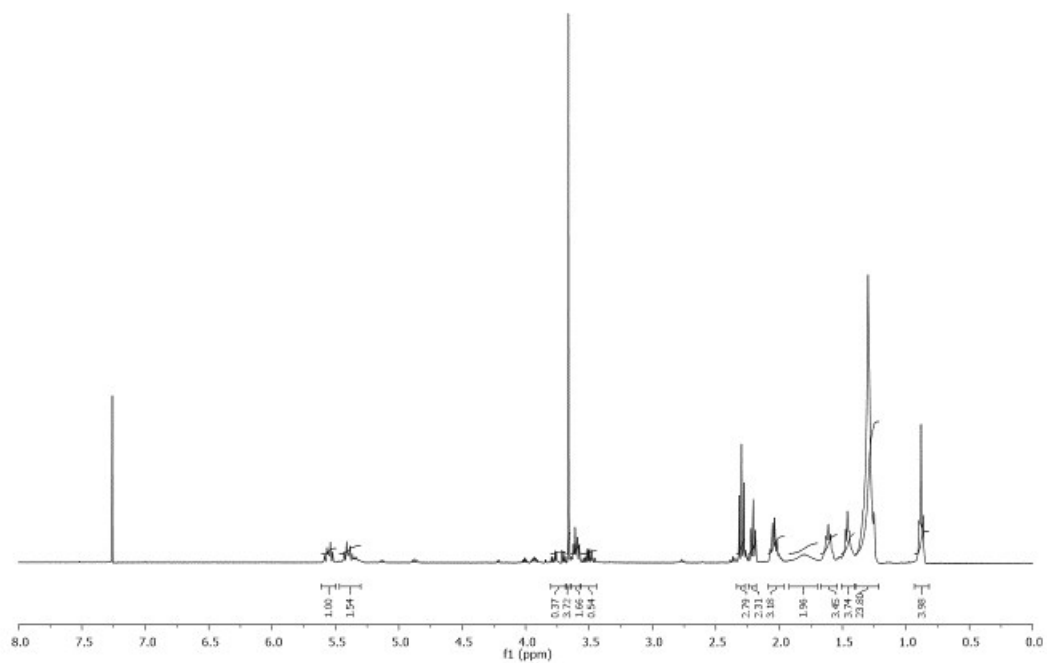

$^{13}\text{C}$  NMR spectrum ( $\text{DMSO}-d_6$ ) of the reaction mixture of Castor Oil (**2**) heated at  $60\text{ }^\circ\text{C}$  for 12+6 hours

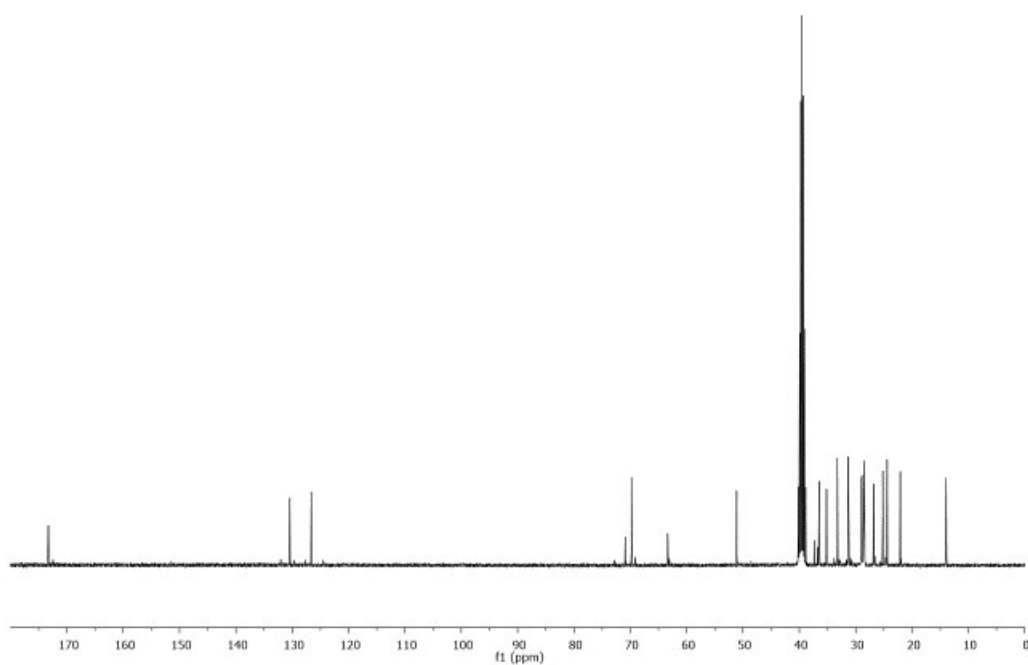

$^1\text{H}$  NMR spectrum ( $\text{CDCl}_3$ ) of methyl ricinoleate (**6**)

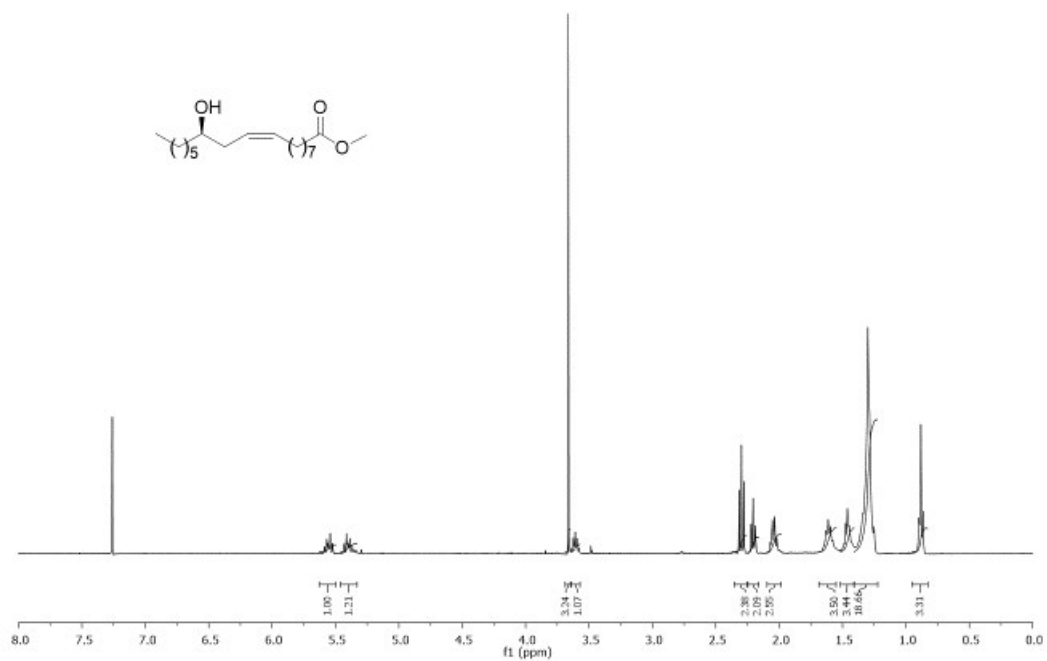

$^1\text{H}$  NMR spectrum ( $\text{CDCl}_3$ ) of 1-MBH (**4**)

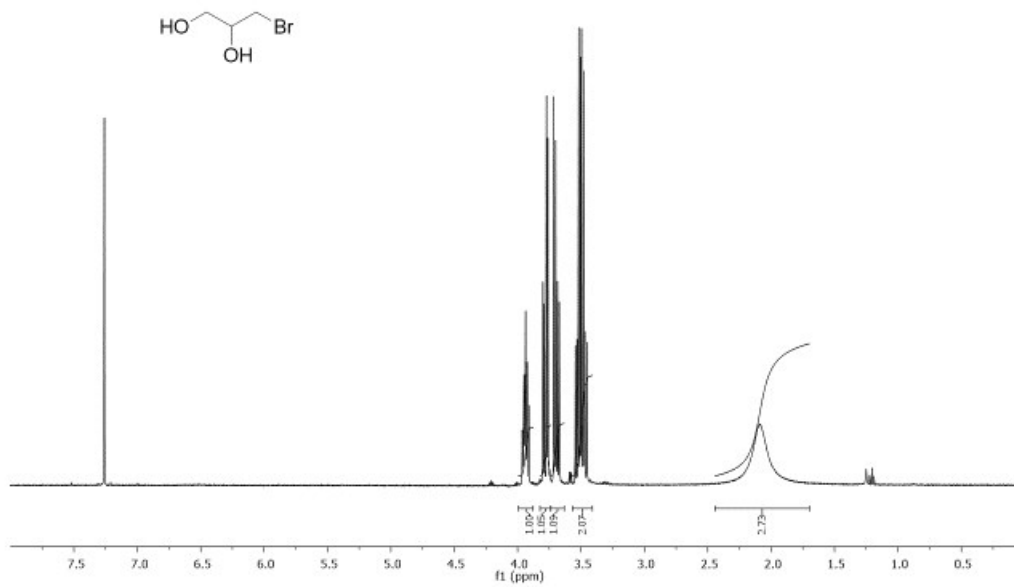

$^{13}\text{C}$  NMR spectrum ( $\text{CDCl}_3$ ) of 1-MBH (**4**)

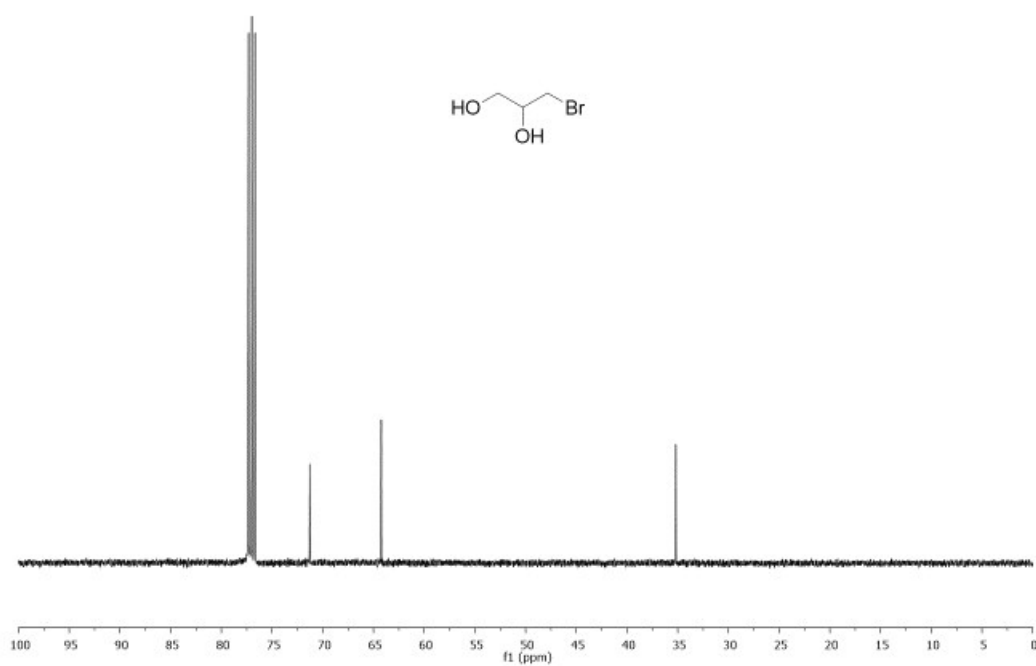

$^1\text{H}$  NMR spectrum ( $\text{CDCl}_3$ ) of 1,3-DBH (**8**)

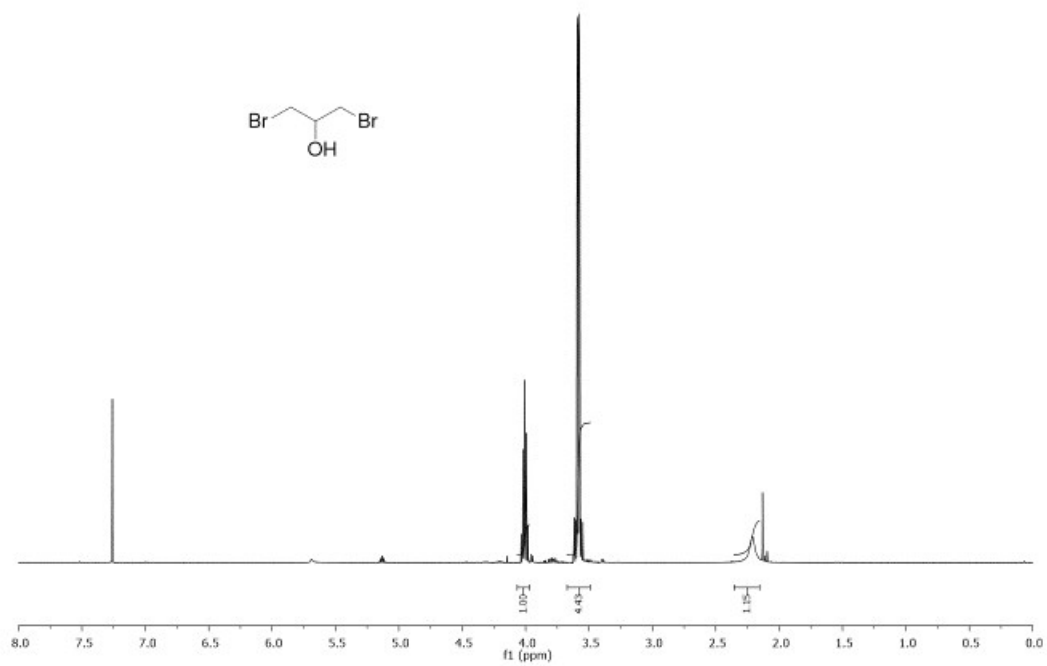

$^{13}\text{C}$  NMR spectrum ( $\text{CDCl}_3$ ) of 1,3-DBH (**8**)

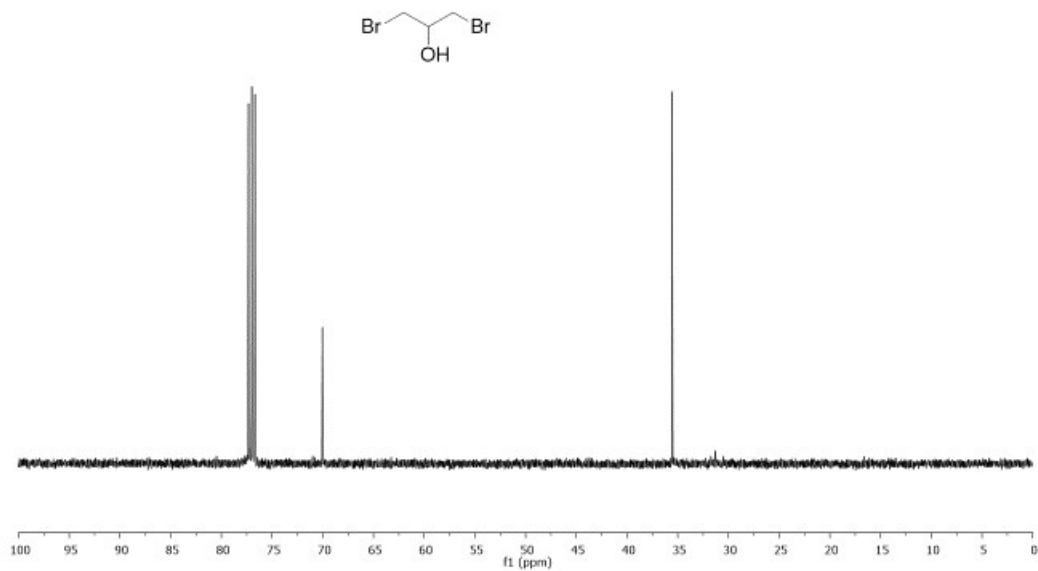

Supplement: d1ra01980e1.pdf [file d1ra01980e1.pdf]
